# Supplementary material for: Cerebral Organoids for Modeling of HSV-1-Induced-Amyloid β Associated Neuropathology and Phenotypic Rescue
Source: MDPI journal article supplement (doi:10.3390/ijms23115981), 2022-05-26
Supplement: s1 [file s1]

Figure S1

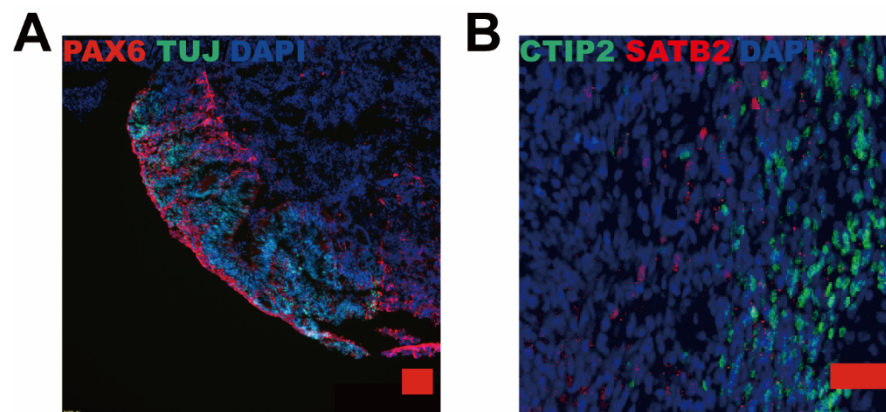

**Figure S1.** The cerebral layer of cerebral organoids at different stage. **(A)** The immunofluorescence staining for PAX6 (dorsal forebrain NSC marker) and TUJ (newborn neuron marker) in the cerebral organoids at the D45. **(B)** The immunofluorescence staining for SATB2 (late-born neuron marker) and CTIP2 (early-born neuron marker) in the cerebral organoids at D68. Scale bar 100  $\mu$ m.
